# Supplementary material for: Metabolic heterogeneity protects metastatic mucosal melanomas cells from ferroptosis
Source: PubMed Central journal article supplement — Int J Mol Med. 2022 Aug 16;50(4):124. doi: 10.3892/ijmm.2022.5180 (PMC9448297; doi:10.3892/ijmm.2022.5180), 2022-08-16

Figure S1. Characteristics of LAD-induced mouse model of AMI. (A) Representative images of TTC-stained mouse heart after LAD. (B) The anterior wall thickness of mouse heart on day 14 after LAD (n=5 per group). (C) The collagen deposition rate of mouse heart on day 14 after LAD (n=5). Statistical analysis of (D) LVSP, (E) LVEDP, (F) +dp/dt and (G) -dp/dt of mice after LAD (n=5 per group). Data are presented as mean  $\pm$  standard deviation. LAD, left anterior descending coronary artery; AMI, acute myocardial infarction; TTC, 2,3,5-Triphenyltetrazolium chloride; LVSP, left ventricular systolic pressure; LVEDP, left ventricular end-diastolic pressure.

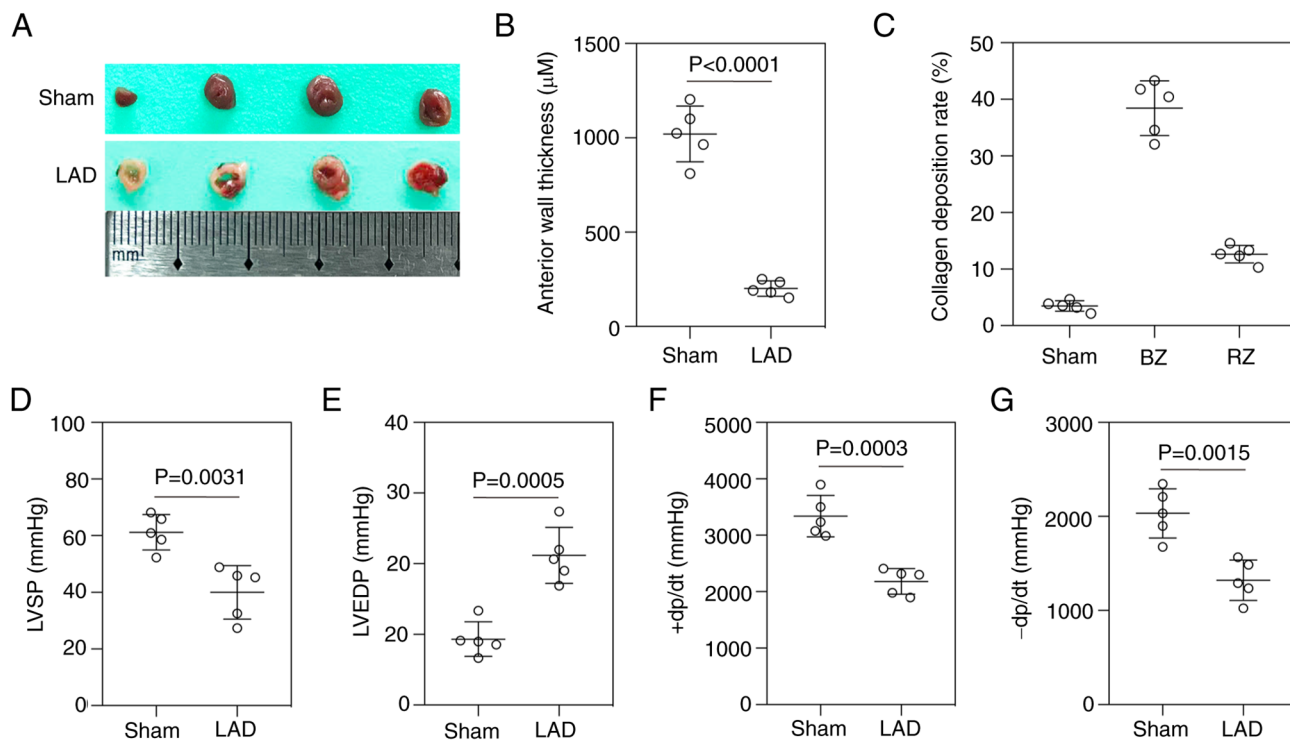

Supplement: Supplementary_Data1.pdf [file Supplementary_Data1.pdf]
