# Supplementary material for: Metabolic heterogeneity protects metastatic mucosal melanomas cells from ferroptosis
Source: PubMed Central journal article supplement — Int J Mol Med. 2022 Aug 16;50(4):124. doi: 10.3892/ijmm.2022.5180 (PMC9448297; doi:10.3892/ijmm.2022.5180), 2022-08-16
Supplement: Supplementary_Data2.pdf [file Supplementary_Data2.pdf]

Table SI. Predicted binding sites for ZNF667 in the promoters of 10 angiogenesis-related genes using JASPAR database.

| Gene symbol    | Number of predicted binding site | Score of predicted binding site | Relative score of predicted binding site | Location of predicted binding site (bp) |
|----------------|----------------------------------|---------------------------------|------------------------------------------|-----------------------------------------|
| <i>VEGFA</i>   | 3                                | 9.12, 8.91, 8.32                | 0.81, 0.80, 0.80                         | -491~-485, -614~-608, -1123~-1117       |
| <i>VASH1</i>   | 2                                | 9.363, 12.234                   | 0.84, 0.82                               | -226~-222, -154~-158                    |
| <i>SVBP</i>    | 2                                | 6.84, 7.21                      | 0.80, 0.81                               | -334~-328, -927~-921                    |
| <i>PFKFB3</i>  | 2                                | 10.0, 8.48                      | 0.85, 0.81                               | -214~-208, -689~-683                    |
| <i>FGF2</i>    | 1                                | 7.31                            | 0.81                                     | -1799~-1788                             |
| <i>KDR</i>     | 2                                | 7.99, 7.33                      | 0.82, 0.81                               | -450~-439, -1437~-1426                  |
| <i>FLT1</i>    | 3                                | 5.46, 5.15, 5.51                | 0.77, 0.77, 0.78                         | -60~-49, -220~-209, -1190~-1179         |
| <i>ANGPT1</i>  | 2                                | 7.79, 7.75                      | 0.82, 0.81                               | -903~-892, -864~-853                    |
| <i>ANGPT12</i> | 3                                | 7.97, 7.57, 7.32                | 0.82, 0.81, 0.81                         | -849~-838, -106~-95, -1120~-1109        |
| <i>TEK</i>     | 3                                | 7.97, 7.97, 7.89                | 0.82, 0.82, 0.82                         | -1503~-1492, -245~-234, -117~-106       |
