# Supplementary material for: Metabolic heterogeneity protects metastatic mucosal melanomas cells from ferroptosis
Source: PubMed Central journal article supplement — Int J Mol Med. 2022 Aug 16;50(4):124. doi: 10.3892/ijmm.2022.5180 (PMC9448297; doi:10.3892/ijmm.2022.5180), 2022-08-16
Supplement: Supplementary_Data3.pdf [file Supplementary_Data3.pdf]

Video S1. Images were collected every 10 min over a period of 5 h. The video displayed that COMM-AD and COMM-SUS cells showed a dynamic conversion. Green arrows indicate COMM-AD cells transferred into COMM-SUS cells, yellow arrows indicate COMM-SUS cells transferred into COMM-AD cells. COMM, Chinese oral mucosal melanoma; COMM-AD, cells with adhesive morphology; COMM-SUS, cells grown in suspension.
